# Supplementary material for: Induction of PD-L1 Expression by the EML4–ALK Oncoprotein and Downstream Signaling Pathways in Non–Small Cell Lung Cancer
Source: Oxford University Press journal article supplement (doi:10.1158/1078-0432.ccr-15-0016), 2015-05-28
Supplement: 10780432ccr150016-sup-143148_1_supp_2969397_ns6tq1.docx [file 10780432ccr150016-sup-143148_1_supp_2969397_ns6tq1.docx]

**Supplementary Table S1.** Patient characteristics

| Characteristic |  | Value or no. of patients |
| --- | --- | --- |
| Age (years)  Sex  Smoking status  Histology  p-Stage  *ALK* fusion status | Median  Range  Male  Female  Never-smoker  Smoker  Adenocarcinoma  Squamous cell carcinoma  IA  IB  IIA  IIB  IIIA  IIIB  Wild type  *ALK* fusion | 68  39–82  92  42  41  93  81  53  27  28  7  29  33  10  123  11 |
